## 20 **ABSTRACT**

### 21 **Introduction**

22 About 38.4 million people were living with HIV as of 2021, and HIV is more prevalent in  
23 sub-Saharan Africa. Pre-exposure prophylaxis (PrEP) is highly effective in HIV  
24 prevention. Despite the efficacy of PrEP, many persons, including men, do not have  
25 adequate knowledge and awareness of PrEP, and reviews on knowledge and awareness  
26 among men are scarce. This review aims to assess and synthesize the knowledge and  
27 awareness of PrEP among persons assigned as males at birth in sub-Saharan Africa.

### 28 **Method and analysis**

29 The proposed scoping review will be conducted in accordance with the PRISMA  
30 Extension for Scoping Reviews (PRISMA-ScR): Checklist and Explanation. The following  
31 information sources will be searched to retrieve relevant studies for this review: CINAHL,  
32 MEDLINE (Ovid), PubMed, SCOPUS, and Web of Science. Google Scholar, The Union  
33 Catalogue of Theses and Dissertations (UCTD) and SA ePublications via SABINET  
34 Online, WorldCat Dissertations and Theses via OCLC, ResearchGate, and American  
35 Doctoral Dissertations via EBSCOhost. All study designs, except existing reviews, will be  
36 included. All screenings (abstract screening and full-text screening) and data extraction  
37 will be conducted independently by two reviewers. Quantitative findings will be presented  
38 with frequency and percentages, while qualitative thematic analysis will be used to  
39 analyze qualitative findings.

### 40 **Ethics and dissemination**

41 Due to the use of primary published data, ethical approval is not required for this review.  
42 The results of this review will be presented at a conference and published in a high-impact  
43 peer-review journal.

44 **Keywords:** knowledge; awareness; PrEP; men; sub-Saharan Africa

## 45 INTRODUCTION

46 About 38.4 million people were living with HIV as of 2021, which is more prevalent in sub-  
47 Saharan Africa [1]. Abstinence, appropriate condom use, and biomedical prevention such  
48 as post-exposure prophylaxis (PEP) and pre-exposure prophylaxis (PrEP) are strategies  
49 to prevent HIV [2]. In 2012, the World Health Organization (WHO) recommended PrEP  
50 to priority groups, such as transgender people, sex workers (SWs), and men who have  
51 sex with other men (MSM) [3]. Later, in 2015, the WHO recommended PrEP to persons  
52 with a substantial risk of HIV [4].

53 PrEP, a biomedical prevention intervention, has provided the opportunity to limit HIV  
54 incidence among priority groups and the general population [5]. PrEP is highly effective  
55 in HIV prevention [6–8]. Daily use of PrEP reduces HIV risk by 75% to 99% [9,10].  
56 However, the low perceived risk of HIV and poor awareness and knowledge of PrEP limits  
57 the use of PrEP, especially in HIV hyperendemic settings [10,11].

58 Despite the efficacy of PrEP, many persons, including men (defined as those assigned  
59 male at birth: cisgender men, MSM and transgender women), at risk of HIV do not have  
60 adequate knowledge or are not aware of PrEP. For example, only 45% of transgender  
61 women surveyed in South Africa were aware of PrEP [12]. Similarly, only 45.8% of MSM  
62 and transgender women were aware of PrEP in Zimbabwe [9], and more than half (53.6%)  
63 of MSM in Nigeria were aware of PrEP in Nigeria [13].

64 Several individual and interpersonal factors are associated with awareness and  
65 knowledge of PrEP among men; individual factors such as self-efficacy, having health  
66 insurance and residing in an urban area determine awareness and knowledge of PrEP

67 [14,15]. Interpersonal factors such as having social support and being a member of a  
68 lesbian, gay, bisexual and transgender organization, and having a partner who is living  
69 with HIV are associated with PrEP awareness [13–15].

70 Generally, men are less likely to know their HIV status and are more likely to be  
71 unengaged in HIV care than women [16]. For instance, 90% of women in South Africa  
72 are aware of their HIV status compared to 82% of men, and more women are on  
73 antiretroviral therapy than men (65% versus 54%) as of the end of 2016 [16,17]. This  
74 suggests that men are behind in seeking care HIV care and prevention, due to multiple  
75 interpersonal and structural factors, including long waiting hours at the clinics, stigma,  
76 financial constraints due to travelling costs, discrimination, privacy concerns, poor  
77 knowledge of PrEP and where to assess it [18,19].

78 HIV treatment as prevention is effective in the prevention of HIV transmission from a  
79 seropositive person to an uninfected person if used consistently and as prescribed [20].  
80 However, prevention is often said to be better than treatment, and the use of PrEP may  
81 be considered ‘HIV prevention as treatment’, especially for MSM and transgender  
82 women, as they have a higher risk of contracting HIV [1].

83 Earlier reviews on PrEP have focused on willingness, uptake, adherence, barriers, and  
84 facilitators to PrEP among MSM [21–25], while one earlier review investigated PEP  
85 awareness among MSM [26]. The reason for the focus on MSM is understandable, as  
86 MSM are disproportionately more likely at risk of HIV, and the initial focus of PrEP was  
87 on priority groups, including transgender persons and MSM [3]. Kamitani *et al.* [22], in  
88 their scoping review, found that most studies on PrEP focused on MSM; the  
89 recommendation of PrEP for MSM by the WHO may have contributed to the focus on

90 MSM [27]. However, not many primary studies have investigated the knowledge and  
91 awareness of PrEP among the general population or heterosexual men only [27]. By  
92 extension, reviews on knowledge and awareness of PrEP are scarce. To bridge this gap,  
93 this review aims to assess and synthesize the knowledge and awareness of PrEP among  
94 persons assigned as males at birth in sub-Saharan Africa.

## 95 **Objectives**

- 96 • To assess the knowledge and awareness of PrEP among men in sub-Saharan  
97 Africa.
- 98 • To identify factors associated with knowledge and awareness of PrEP among men  
99 in sub-Saharan Africa.

## 100 **METHODS AND ANALYSIS**

101 The proposed scoping review will be conducted following the PRISMA Extension for  
102 Scoping Reviews (PRISMA-ScR): Checklist and Explanation [28].

- 103 1. Identifying the research questions,
- 104 2. Identifying relevant studies,
- 105 3. Study selection,
- 106 4. Charting the data,
- 107 5. Collating, summarizing, and reporting results.

## 108 **Research questions**

- 109 • Are men in sub-Saharan Africa knowledgeable and aware of PrEP?

- 110       • What are the associated factors with knowledge and awareness of PrEP among  
111       men in sub-Saharan Africa?

## 112 **Identifying relevant studies**

113 The search strategy aims to find both published and unpublished studies. We will conduct  
114 a preliminary search on PubMed, after which we will analyze text words and index terms  
115 used to describe the articles. This will assist in the creation of a search strategy that is  
116 specific to each information source. The following information sources will be searched  
117 to retrieve relevant studies for this review: CINAHL, MEDLINE (Ovid), PubMed, SCOPUS,  
118 and Web of Science. Google Scholar, The Union Catalogue of Theses and Dissertations  
119 (UCTD) and SA ePublications via SABINET Online, WorldCat Dissertations and Theses  
120 via OCLC, ResearchGate, and American Doctoral Dissertations via EBSCOhost will all  
121 be searched for unpublished academic research (theses and/or dissertations). All studies  
122 eligible for inclusion will have their reference lists checked for potential additional articles.  
123 Our search technique will include boolean terms (AND, OR) and Medical Subject  
124 Headings (MeSH) phrases. The following key search words will be used: knowledge,  
125 awareness, pre-exposure prophylaxis, men, and sub-Saharan Africa. Some relevant  
126 MeSH terms include "Health Knowledge, Attitudes, Practice"[Mesh], "Awareness"[Mesh],  
127 "Pre-Exposure Prophylaxis"[Mesh], "Men"[Mesh], and "Africa South of the  
128 Sahara"[Mesh]. Each keyword will be combined with relevant MeSH and synonymous  
129 terms with the "OR" Boolean operator to form a block, while each block will be combined  
130 with the "AND" Boolean operator (see S1 Table). We will also employ African country  
131 names and abbreviated terms like "east Africa/ west Africa" to ensure that articles indexed  
132 using African nation-specific names or regional terms are retrieved.

133 **Eligibility criteria**

134 **Types of participants**

135 Only studies focused on adults (18 years and above) assigned male at birth will be  
136 included.

137 **Type of outcome**

138 Studies that assessed knowledge or awareness of PrEP among men in sub-Saharan  
139 Africa will be considered.

140 **Type of Studies**

141 All study designs will be included in this scoping review, except for existing reviews (rapid  
142 review, scoping review, a systematic review with or without meta-analysis, among others).  
143 However, only the baseline findings of cohort studies and trials (randomized or non-  
144 randomized trials) will be reported. Furthermore, conference proceedings and relevant  
145 dissertations will be considered in this review.

146 **Other criteria**

147 Studies published earlier than 2012 will be excluded since the first PrEP drug was  
148 approved in the year 2012 [29]. There will be no restriction on language.

149 **Study procedure and selection of the studies**

150 All citations identified by the search will be downloaded and imported into Rayyan  
151 systematic review manager for deduplication and screening of articles [30]. Two authors  
152 (OAB and MH) will screen the title and abstract of all articles independently to determine  
153 their eligibility. Articles that do not meet the study's eligibility criteria will be excluded. The

154 full text of articles that appear to have met the eligibility criteria will be obtained and  
155 screened independently by two authors (OAA and OAB). Discussion or collaboration with  
156 a third reviewer will be used to settle any disputes between the two independent  
157 reviewers, if any.

## 158 **Charting the data**

159 The Joanna Briggs Institute's template for data extraction will be adapted for data  
160 extraction. The following data will be extracted from each study that meets the eligibility  
161 criteria: last name of the first author, year of publication, study objective(s), study setting,  
162 participant's characteristics, sample size, the country where the study was conducted,  
163 sampling method, data collection method, data analysis, study limitations and  
164 implications, knowledge and/or awareness of PrEP (in the form of prevalence or  
165 responses to individual questions), factors associated with knowledge and awareness of  
166 PrEP (bivariate and multivariate analysis), and conclusions from authors. One author  
167 (OAB) will extract relevant data from all included studies, while two other authors (MH  
168 and OAA) will verify the extraction.

## 169 **Collating, summarizing, and reporting the results**

170 Quantitative findings will be synthesized and summarized with a narrative approach. The  
171 prevalence of knowledge and awareness will be descriptively summarized. Furthermore,  
172 descriptive statistics will be used to represent the region based on the World Health  
173 Organization regional classification, sampling method (probability or non-probability),  
174 characteristics of the participants, and factors associated with knowledge and awareness

175 of PrEP. Qualitative thematic analysis will be used to analyze qualitative studies.  
176 Depending on the findings, the quantitative and qualitative findings will be triangulated.

### 177 **Patient and public involvement**

178 Patients or the public will not be directly involved in the design or dissemination of this  
179 review's findings.

### 180 **Ethics and dissemination**

181 Ethical clearance is not warranted as already published studies will be reviewed and  
182 synthesized. The findings of this review will be published in an open-access journal for  
183 adequate dissemination and publicity. The findings will be shared with relevant  
184 researchers, policymakers and non-governmental organizations interested in HIV  
185 prevention.

### 186 **DISCUSSION**

187 This scoping review will assess the knowledge and awareness of PrEP and associated  
188 factors among men in sub-Saharan Africa. This review will be the first to chart the  
189 knowledge of men in sub-Saharan Africa. This review will help understand the level of  
190 PrEP knowledge among men in sub-Saharan Africa and the factors that predict PrEP  
191 knowledge. The identified predictors or determinants can serve as targets for future  
192 interventions to improve knowledge and awareness of PrEP among men. Furthermore,  
193 the findings of this review may lead to policy formation tailored towards men's knowledge  
194 in several sub-Saharan African countries. The findings of this review will be disseminated  
195 in the form of conference presentations and peer-review publication.

196 **REFERENCES**

- 197 1. UNAIDS. Global AIDS Update 2022. 2022 [cited 31 Oct 2022]. Available:  
198 <https://www.unaids.org/en>
- 199 2. CDC. HIV prevention. 1 Jun 2021 [cited 22 Feb 2023]. Available:  
200 <https://www.cdc.gov/hiv/basics/prevention.html>
- 201 3. WHO. Consolidated guidelines on HIV prevention, diagnosis, treatment and care  
202 for key populations. 1 Jul 2016 [cited 22 Feb 2023]. Available:  
203 <https://www.who.int/publications-detail-redirect/9789241511124>
- 204 4. WHO. Guideline on When to Start Antiretroviral Therapy and on Pre-Exposure  
205 Prophylaxis for HIV. World Health Organization; 2015. Available:  
206 <https://www.ncbi.nlm.nih.gov/books/NBK327115/>
- 207 5. Lyons CE, Stokes-Cawley OJ, Simkin A, Bowring AL, Mfochive Njindam I, Njoya O,  
208 et al. Modeling the potential impact of pre-exposure prophylaxis for HIV among  
209 men who have sex with men in Cameroon. *BMC Infect Dis.* 2022;22: 751.  
210 doi:10.1186/s12879-022-07738-z
- 211 6. Coulaud P-J, Sagaon-Teyssier L, M'madi Mrenda B, Maradan G, Mora M, Bourrelly  
212 M, et al. Interest in HIV pre-exposure prophylaxis in men who have sex with men in  
213 West Africa (CohMSM ANRS 12324 - Expertise France). *Trop Med Int Health.*  
214 2018;23: 1084–1091. doi:10.1111/tmi.13129
- 215 7. Muwonge TR, Nsubuga R, Brown C, Nakyanzi A, Bagaya M, Bambia F, et al.  
216 Knowledge and barriers of PrEP delivery among diverse groups of potential PrEP  
217 users in Central Uganda. *PLoS One.* 2020;15: e0241399.  
218 doi:10.1371/journal.pone.0241399
- 219 8. Adeagbo O, Harrison S, Qiao S, Li X. Pre-Exposure Prophylaxis (PrEP) Uptake  
220 among Black Men Who Have Sex with Men (BMSM) in the Southern U.S.  
221 *International Journal of Environmental Research and Public Health.* 2021;18: 9715.  
222 doi:10.3390/ijerph18189715
- 223 9. Parmley LE, Harris TG, Chingombe I, Mapingure M, Mugurungi O, Rogers JH, et  
224 al. Engagement in the pre-exposure prophylaxis (PrEP) cascade among a  
225 respondent-driven sample of sexually active men who have sex with men and  
226 transgender women during early PrEP implementation in Zimbabwe. *J Int AIDS  
227 Soc.* 2022;25: e25873. doi:10.1002/jia2.25873
- 228 10. Ssuna B, Katahoire A, Armstrong-Hough M, Kalibbala D, Kalyango JN, Kiweewa  
229 FM. Factors associated with willingness to use oral pre-exposure prophylaxis  
230 (PrEP) in a fisher-folk community in peri-urban Kampala, Uganda. *BMC Public  
231 Health.* 2022;22: 468. doi:10.1186/s12889-022-12859-w

- 232 11. Jayakumaran JS, Aaron E, Gracely EJ, Schriver E, Szep Z. Knowledge, Attitudes,  
233 and Acceptability of Pre-Exposure Prophylaxis among Individuals Living with HIV in  
234 an Urban HIV Clinic. *PLOS ONE*. 2016;11: e0145670.  
235 doi:10.1371/journal.pone.0145670
- 236 12. Poteat T, Malik M, van der Merwe LLA, Cloete A, Adams D, Nonyane BAS, et al.  
237 PrEP awareness and engagement among transgender women in South Africa: a  
238 cross-sectional, mixed methods study. *Lancet HIV*. 2020;7: e825–e834.  
239 doi:10.1016/S2352-3018(20)30119-3
- 240 13. Ogunbajo A, Iwuagwu S, Williams R, Biello K, Mimiaga MJ. Awareness, willingness  
241 to use, and history of HIV PrEP use among gay, bisexual, and other men who have  
242 sex with men in Nigeria. *PLoS One*. 2019;14: e0226384.  
243 doi:10.1371/journal.pone.0226384
- 244 14. Ogunbajo A, Kang A, Shangani S, Wade RM, Onyango DP, Odero WW, et al.  
245 Awareness and Acceptability of pre-exposure prophylaxis (PrEP) among gay,  
246 bisexual and other men who have sex with men (GBMSM) in Kenya. *AIDS Care*.  
247 2019;31: 1185–1192. doi:10.1080/09540121.2019.1612023
- 248 15. Kimani M, Sanders EJ, Chirro O, Mukuria N, Mahmoud S, Rinke de Wit TF, et al.  
249 Pre-exposure prophylaxis for transgender women and men who have sex with  
250 men: qualitative insights from healthcare providers, community organization-based  
251 leadership and end users in coastal Kenya. *Int Health*. 2022;14: 288–294.  
252 doi:10.1093/inthealth/ihab043
- 253 16. Hannaford A, Lim J, Moll A, Khoza B, Shenoi SV. “PrEP should be for men only”:  
254 Young heterosexual men’s views on PrEP in rural South Africa. *Global public  
255 health*. 2020;15. doi:10.1080/17441692.2020.1744680
- 256 17. UNAIDS. A snapshot of men and HIV in South Africa. 2017. Available:  
257 [https://www.unaids.org/sites/default/files/snapshot-men-hiv-south-africa\\_en.pdf](https://www.unaids.org/sites/default/files/snapshot-men-hiv-south-africa_en.pdf)
- 258 18. Hlongwa M, Cornell M, Malone S, Pitsillides P, Little K, Hasen N. Uptake and  
259 Short-Term Retention in HIV Treatment Among Men in South Africa: The Coach  
260 Mpilo Pilot Project. *Global Health: Science and Practice*. 2022;10.  
261 doi:10.9745/GHSP-D-21-00498
- 262 19. Hlongwa M, Hlongwana K, Makhunga S, Choko AT, Dzinamarira T, Conserve D, et  
263 al. Linkage to HIV Care Following HIV Self-testing Among Men: Systematic Review  
264 of Quantitative and Qualitative Studies from Six Countries in Sub-Saharan Africa.  
265 *AIDS Behav*. 2023;27: 651–666. doi:10.1007/s10461-022-03800-8
- 266 20. Tattersall T, Tam C, Moore D, Wesseling T, Grieve S, Wang L, et al. Healthcare  
267 and treatment experiences among people diagnosed with HIV before and after a  
268 province-wide treatment as prevention initiative in British Columbia, Canada. *BMC  
269 Public Health*. 2022;22: 1022. doi:10.1186/s12889-022-13415-2

- 270 21. Hannaford A, Lipshie-Williams M, Starrels JL, Arnsten JH, Rizzuto J, Cohen P, et  
271 al. The Use of Online Posts to Identify Barriers to and Facilitators of HIV Pre-  
272 exposure Prophylaxis (PrEP) Among Men Who Have Sex with Men: A Comparison  
273 to a Systematic Review of the Peer-Reviewed Literature. *AIDS Behav.* 2018;22:  
274 1080–1095. doi:10.1007/s10461-017-2011-3
- 275 22. Kamitani E, Mizuno Y, Wichser M, Adegbite AH, DeLuca JB, Higa DH. Mapping the  
276 study characteristics and topics of hiv pre-exposure prophylaxis research literature:  
277 A scoping review. *AIDS Educ Prev.* 2019;31: 505–522.  
278 doi:10.1521/aeap.2019.31.6.505
- 279 23. Maticcotta JJ, Rosales-Perez FJ, Carrillo CM. HIV Preexposure Prophylaxis and  
280 Treatment as Prevention — Beliefs and Access Barriers in Men Who Have Sex  
281 With Men (MSM) and Transgender Women: A Systematic Review. *J Patient Cent  
282 Res Rev.* 2020;7: 265–274. doi:10.17294/2330-0698.1737
- 283 24. Sun Z, Gu Q, Dai Y, Zou H, Agins B, Chen Q, et al. Increasing awareness of HIV  
284 pre-exposure prophylaxis (PrEP) and willingness to use HIV PrEP among men who  
285 have sex with men: a systematic review and meta-analysis of global data. *J Int  
286 AIDS Soc.* 2022;25: e25883. doi:10.1002/jia2.25883
- 287 25. Wang Y, Mitchell JW, Zhang C, Liu Y. Evidence and implication of interventions  
288 across various socioecological levels to address pre-exposure prophylaxis uptake  
289 and adherence among men who have sex with men in the United States: a  
290 systematic review. *AIDS Res Ther.* 2022;19: 28. doi:10.1186/s12981-022-00456-1
- 291 26. Jin J, Sun R, Mu T, Jiang T, Dai L, Lu H, et al. Awareness and Use of Post-  
292 exposure Prophylaxis for HIV Prevention Among Men Who Have Sex With Men: A  
293 Systematic Review and Meta-Analysis. *Front Med (Lausanne).* 2022;8: 783626.  
294 doi:10.3389/fmed.2021.783626
- 295 27. Shamu S, Shamu P, Khupakonke S, Farirai T, Chidarikire T, Guloba G, et al. Pre-  
296 exposure prophylaxis (PrEP) awareness, attitudes and uptake willingness among  
297 young people: gender differences and associated factors in two South African  
298 districts. *Glob Health Action.* 2021;14: 1886455.  
299 doi:10.1080/16549716.2021.1886455
- 300 28. Tricco AC, Lillie E, Zarin W, O'Brien KK, Colquhoun H, Levac D, et al. PRISMA  
301 Extension for Scoping Reviews (PRISMA-ScR): Checklist and Explanation. *Ann  
302 Intern Med.* 2018;169: 467–473. doi:10.7326/m18-0850
- 303 29. Chandler R, Guillaume D, Wells J, Hernandez N. Let Me Prep You to PREP Me:  
304 Amplifying the Voices of Black Women and Their Providers to Consider PrEP as an  
305 HIV Prevention Option. *International Journal of Environmental Research and Public  
306 Health.* 2022;19: 1414. doi:10.3390/ijerph19031414

- 307 30. Ouzzani M, Hammady H, Fedorowicz Z, Elmagarmid A. Rayyan—a web and  
308 mobile app for systematic reviews. *Systematic Reviews*. 2016;5: 210.  
309 doi:10.1186/s13643-016-0384-4
